# Supplementary material for: The Phenoxyalkyltriazine Antagonists for 5-HT6 Receptor with Promising Procognitive and Pharmacokinetic Properties In Vivo in Search for a Novel Therapeutic Approach to Dementia Diseases
Source: MDPI journal article supplement (doi:10.3390/ijms221910773), 2021-10-05
Supplement: s1 [file s1]

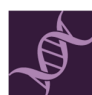

Supplementary materials

**Table S1.** Results of functional assay towards 5-HT<sub>6</sub>.

| Agonist Mode* |           |     |                         |                   |                   | Antagonist Mode** |           |     |                          |                  |                   |       |                          |                |                 |        |                |
|---------------|-----------|-----|-------------------------|-------------------|-------------------|-------------------|-----------|-----|--------------------------|------------------|-------------------|-------|--------------------------|----------------|-----------------|--------|----------------|
|               | E max (%) | SEM | EC <sub>50</sub>        | pEC <sub>50</sub> | SE M              |                   | E max (%) | SEM | IC <sub>50</sub>         | IC <sub>50</sub> | pIC <sub>50</sub> | SEM   | K <sub>b</sub>           | K <sub>b</sub> | pK <sub>b</sub> | SEM    | R <sup>2</sup> |
|               |           |     | M                       |                   | pEC <sub>50</sub> |                   |           |     |                          |                  |                   |       |                          |                |                 |        |                |
|               |           |     |                         |                   |                   |                   |           |     |                          |                  |                   |       |                          |                |                 |        |                |
| Serotonin     | 100       | 0.5 | 2.76 × 10 <sup>-9</sup> | 8.6               | 0                 | Serotonin         | 0.0       | 1.0 | N.C                      | N.C              | N.C               | N.C   | N.C                      | N.C            | N.C             | N.C    | N.C            |
| SB 258585     | 2         | 0.5 | N.C.                    | N.C.              | N.C               | SB 258585         | 100       | 0.7 | 6.01 × 10 <sup>-9</sup>  | 6.0              | 8.22              | 0.10  | 1.20 × 10 <sup>-9</sup>  | 1.2            | 8.92            | 0.10   | 0.945          |
| Mianseri      | 2         | 0.5 | N.C.                    | N.C.              | N.C               | MI-AN-SER-IN      | 91        | 4.0 | 4.15 × 10 <sup>-6</sup>  | 4152.0           | 5.38              | 0.05  | 8.31 × 10 <sup>-7</sup>  | 830.5          | 6.08            | 0.05   | 0.988          |
| 1             | 4         | 0.5 | N.C.                    | N.C.              | N.C               | 1                 | 98        | 1.3 | 1.40 × 10 <sup>-10</sup> | 1400.0           | 9.87              | 0.065 | 2.70 × 10 <sup>-11</sup> | 0.027          | 10.57           | 0.0065 | 0.907          |
| 2             | 5         | 1.1 | N.C.                    | N.C.              | N.C               | 2                 | 96        | 3.1 | 6.33 × 10 <sup>-8</sup>  | 63.3             | 7.12              | 0.33  | 6.46 × 10 <sup>-9</sup>  | 6.5            | 8.19            | 0.33   | 0.903          |
| 3             | 9         | 3.3 | N.C.                    | N.C.              | N.C               | 3                 | 100       | 0.7 | 1.07 × 10 <sup>-7</sup>  | 106.6            | 6.97              | 0.20  | 2.13 × 10 <sup>-8</sup>  | 21.3           | 7.67            | 0.20   | 0.972          |

\*Results were normalized as percentage of maximal agonist response (Serotonin 10<sup>-5</sup> M) \*\*Results were normalized as percentage of reference antagonist (SB258585 10<sup>-5</sup> M) Emax is the maximum possible effect.

N.C.—not calculable.

**Table S2.** Results of functional assay towards 5-HT<sub>2A</sub>.

| Agonist Mode* |           |     |                  |                   | Antagonist mode** |           |     |                         |                  |                   |                          |                |                 |                |
|---------------|-----------|-----|------------------|-------------------|-------------------|-----------|-----|-------------------------|------------------|-------------------|--------------------------|----------------|-----------------|----------------|
|               | E max (%) | SEM | EC <sub>50</sub> | pEC <sub>50</sub> |                   | E max (%) | SEM | IC <sub>50</sub>        | IC <sub>50</sub> | pIC <sub>50</sub> | K <sub>b</sub>           | K <sub>b</sub> | pK <sub>b</sub> | R <sup>2</sup> |
|               |           |     | M                |                   |                   |           |     |                         |                  |                   |                          |                |                 |                |
|               |           |     |                  |                   |                   |           |     |                         |                  |                   |                          |                |                 |                |
| Serotonin     | 100       | 0.3 | 1.45 E-09        | 8.84              | Serotonin         | 1         | 0.3 | N.C                     | N.C.             | N.C.              | N.C.                     | N.C.           | N.C.            | N.C.           |
| SB 258585     | N.T.      |     |                  |                   |                   |           |     |                         |                  |                   |                          |                |                 |                |
| Mianserin     | 1         | 0.3 | N.C.             | N.C.              | Mianserin         | 1         | 0.3 | 1.01 × 10 <sup>-9</sup> | 1.01             | 9.00              | 2.01 × 10 <sup>-10</sup> | 0.20           | 9.70            | 0.928          |

|   |      |     |                       |      |   |   |     |                       |       |      |                       |      |      |       |
|---|------|-----|-----------------------|------|---|---|-----|-----------------------|-------|------|-----------------------|------|------|-------|
| 1 | 58   | 9.7 | $4.49 \times 10^{-8}$ | 7.35 | 1 | 0 | 0   | N.C.                  | N.C.  | N.C. | N.C.                  | N.C. | N.C. | N.C.  |
| 2 | 21   | 0.6 | $5.84 \times 10^{-7}$ | 6.22 | 2 | 1 | 0.3 | $1.24 \times 10^{-8}$ | 12.36 | 7.90 | $2.47 \times 10^{-9}$ | 2.47 | 8.61 | 0.984 |
| 3 | N.T. |     |                       |      |   |   |     |                       |       |      |                       |      |      |       |

\*Results were normalized as percentage of maximal agonist response (Serotonin  $10^{-5}$  M) \*\*Results were normalized as percentage of reference antagonist (SB258585  $10^{-5}$  M) Emax is the maximum possible effect.

N.C.—not calculable N.T.—not tested.

**Table S3.** The metabolic pathways of compounds 2 and 3.

| Molecular |                      |                       |                              |                                        |                                     |
|-----------|----------------------|-----------------------|------------------------------|----------------------------------------|-------------------------------------|
| Substrate | Molecular Mass (m/z) | Retention Time (min.) | Mass of the Metabolite (m/z) | Metabolic Pathway                      | Probable Structures of Metabolites* |
| 2         | 397.31               |                       | 413.07 (M1)                  | hydroxylation                          | Fig. S1B                            |
|           |                      |                       | 413.07 (M2)                  | hydroxylation                          | Fig. S1C                            |
|           |                      |                       | 383.03 (M3)                  | demethylation                          | Fig. S1D                            |
| 3         | 328.42               |                       | 279.22 (M1)                  | decomposition and triple hydroxylation | Fig. S2B                            |
|           |                      |                       | 345.28 (M2)                  | hydroxylation                          | Fig. S2C                            |

**Table S4.** The impact of compounds 1–3 on the MK-801-induced memory impairment in the NOR test.

| Treatment             | Dose (mg/kg) |       | Discrimination Index                           |
|-----------------------|--------------|-------|------------------------------------------------|
| Vehicle               | 0            | + 0   | $0.37 \pm 0.03$                                |
| MK-801 + Vehicle [17] | 0.1+0        |       | $-0.07 \pm 0.01$ ; $p < 0.05$ vs veh           |
| 1 + MK-801 [17]       | 0.3          | + 0.1 | $0.29 \pm 0.04$ ; ns vs veh; ns vs MK          |
|                       | 1+0.1        |       | $0.13 \pm 0.08$ ; ns vs veh; ns vs MK          |
|                       | 3+0.1        |       | $0.42 \pm 0.18$ ; ns vs veh; $p < 0.05$ vs MK  |
|                       |              |       | $F(4,30) = 3.9851$ ; $p < 0.01$                |
| Vehicle + Vehicle     | 0            | + 0   | $0.21 \pm 0.05$                                |
| MK-801 + Vehicle      | 0.1+0        |       | $-0.05 \pm 0.03$ ; $p < 0.01$ vs veh           |
| 2 + MK-801            | 0.3          | + 0.1 | $0.26 \pm 0.04$ ; ns vs veh; $p < 0.01$ vs MK  |
|                       | 1+0.1        |       | $0.19 \pm 0.04$ ; ns vs veh; $p < 0.05$ vs MK  |
|                       | 3+0.1        |       | $0.30 \pm 0.06$ ; ns vs veh; $p < 0.001$ vs MK |
|                       |              |       | $F(4,27) = 7.5715$ ; $p < 0.001$               |

|                                |       |       |                                           |
|--------------------------------|-------|-------|-------------------------------------------|
| Vehicle                        | 0     | + 0   | 0.27 ± 0.04                               |
| MK-801 + vehicle               | 0.1+0 |       | -0.11 ± 0.07; $p < 0.05$ vs veh           |
| 3 + MK-801                     | 0.1   | + 0.1 | 0.26 ± 0.04; ns vs veh; $p < 0.01$ vs MK  |
|                                | 0.3   | + 0.1 | 0.30 ± 0.04; ns vs veh, $p < 0.001$ vs MK |
|                                | 1+0.1 |       | 0.18 ± 0.15; ns vs veh, $p < 0.05$ vs MK  |
|                                | 3+0.1 |       | 0.31 ± 0.05, ns vs veh, $p < 0.001$ vs MK |
| F(5,47) = 8.1658; $p < 0.0001$ |       |       |                                           |

Compounds **1**, **2**, **3** were given *i.p.* 60 min while MK-801 was given *i.p.* 30 min before the T1 session. Values represent the mean ± SEM of the discrimination index during 3-min test session compared to the respective vehicle group (one-way ANOVA followed by Bonferroni's post-hoc test); NS—non-significant. N=6-7.

**Table S5.** Effect of compounds **1**, **2**, **3** on the immobility time in FST in rats.

| Treatment | Dose (mg/kg) | Immobility Time (s)           |
|-----------|--------------|-------------------------------|
| Vehicle   | 0            | 259.86 ± 5.4                  |
| <b>1</b>  | 1            | 241.80 ± 18.7                 |
|           | 3            | 175.29 ± 18.1; $p < 0.01$     |
|           | 10           | 163.63 ± 11.2; $p < 0.001$    |
|           |              | F(3,26) = 10.615; $p < 0.001$ |
| Vehicle   | 0            | 227.71 ± 12.7                 |
| <b>2</b>  | 1            | 223.13 ± 11.4                 |
|           | 3            | 220.71 ± 4.7                  |
|           | 10           | 171.38 ± 12.80; $p < 0.01$    |
|           |              | F(3,26) = 5.8561; $p < 0.01$  |
| Vehicle   | 0            | 211.00 ± 9.3                  |
| <b>3</b>  | 1            | 177.50 ± 6.1                  |
|           | 3            | 159.13 ± 13.3; $p < 0.05$     |
|           | 10           | 134.63 ± 16.7; $p < 0.001$    |
|           |              | F(3,26) = 6.8104; $p < 0.01$  |

Decreased immobility time denotes antidepressant-like activity. Compounds **1**, **2**, **3** were given *i.p.* 60 min before the test. Values represent the mean ± SEM of immobility time during 5-min test session compared to the respective vehicle group (one-way ANOVA followed by Bonferroni's post-hoc test); N=6-8.

**Table S6.** Effects of compounds **1**, **2**, **3** in the EPM test in rats.

| Treatment | Dose (mg/kg) | Open Arms                                                                                             |              |             |              |               |
|-----------|--------------|-------------------------------------------------------------------------------------------------------|--------------|-------------|--------------|---------------|
|           |              | Time (s)                                                                                              | % of time    | Entries     | % of entries | Distance (cm) |
| Vehicle   | 0            | 31.39 ± 10.11                                                                                         | 15.00 ± 4.29 | 9.14 ± 1.98 | 29.44 ± 4.82 | 456 ± 137     |
| <b>1</b>  | 1            | 58.90 ± 14.20                                                                                         | 25.76 ± 6.11 | 9.88 ± 1.99 | 32.59 ± 4.23 | 788 ± 175     |
|           | 3            | 24.81 ± 5.24                                                                                          | 10.27 ± 2.05 | 6.14 ± 0.77 | 29.49 ± 3.48 | 307 ± 78      |
|           | 10           | 43.36 ± 9.08                                                                                          | 18.34 ± 4.19 | 7.20 ± 1.66 | 42.23 ± 9.09 | 538 ± 104     |
|           |              | F(3,23) = 2.1368; F(3,23) = 2.3504; NS F(3,23) = 1.0379; NS F(3,23) = 1.2608; NS F(3,23) = 2.3440; NS |              |             |              |               |

| NS      |     |                                 |                                  |                                 |                         |                                  |
|---------|-----|---------------------------------|----------------------------------|---------------------------------|-------------------------|----------------------------------|
| Vehicle | 0   | 32.63 ± 9.50                    | 12.67 ± 3.40                     | 5.00 ± 1.20                     | 24.90 ± 1.90            | 390 ± 116                        |
|         | 0.3 | 36.85 ± 8.90                    | 14.85 ± 3.30                     | 6.50 ± 1.60                     | 23.97 ± 4.97            | 423 ± 87                         |
|         | 1   | 24.75 ± 3.19                    | 10.10 ± 1.20                     | 5.86 ± 0.90                     | 26.53 ± 3.69            | 279 ± 45                         |
| 2       |     | 72.23 ± 7.30; $p < 0.05$        | 30.00 ± 3.60; $p < 0.01$         | 13.00 ± 2.30; $p < 0.05$        | 41.89 ± 3.37            | 914 ± 126; $p < 0.01$            |
|         | 3   | $F(3,23) = 6.9314$ ; $p < 0.01$ | $F(3,23) = 7.7627$ ; $p < 0.001$ | $F(3,23) = 5.0274$ ; $p < 0.01$ | $F(3,23) = 3.9489$ ; NS | $F(3,23) = 8.2188$ ; $p < 0.001$ |
|         |     |                                 |                                  |                                 |                         |                                  |
| Vehicle | 0   | 32.63 ± 9.50                    | 12.67 ± 3.50                     | 5.00 ± 1.20                     | 24.90 ± 1.90            | 390 ± 116                        |
|         | 0.3 | 24.27 ± 3.41                    | 9.84 ± 1.50                      | 5.28 ± 0.42                     | 28.54 ± 6.70            | 340 ± 59                         |
|         | 1   | 44.24 ± 9.71                    | 18.30 ± 4.10                     | 8.43 ± 1.36                     | 33.64 ± 2.70            | 646 ± 145                        |
| 3       |     | 19.00 ± 5.50                    | 7.03 ± 2.00                      | 4.17 ± 1.10                     | 24.39 ± 7.60            | 231 ± 87                         |
|         | 3   | $F(3,22) = 2.1964$ ; NS         | $F(3,22) = 2.6159$ ; NS          | $F(3,22) = 3.0956$ ; NS         | $F(3,22) = 0.6565$ ; NS | $F(3,22) = 2.7192$ ; NS          |

Increased open-arm exploration denotes reduced anxiety. Compounds **1**, **2**, **3** were given *i.p.* 60 min before the test. Values represent the mean ± SEM of the time and percentage of time spent in open arms, entries and percentage of entries into the open arms during 5-min test session compared to the respective vehicle group (one-way ANOVA followed by Bonferroni's post-hoc test); NS—non-significant. N=6-7.

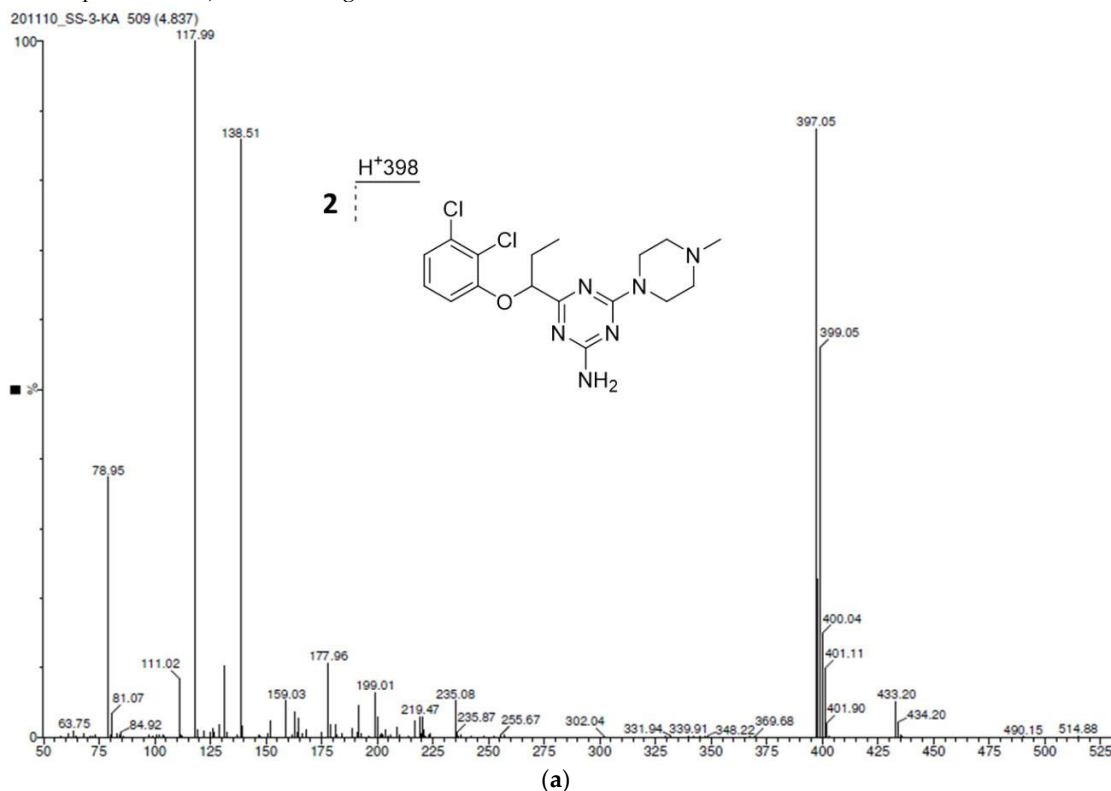

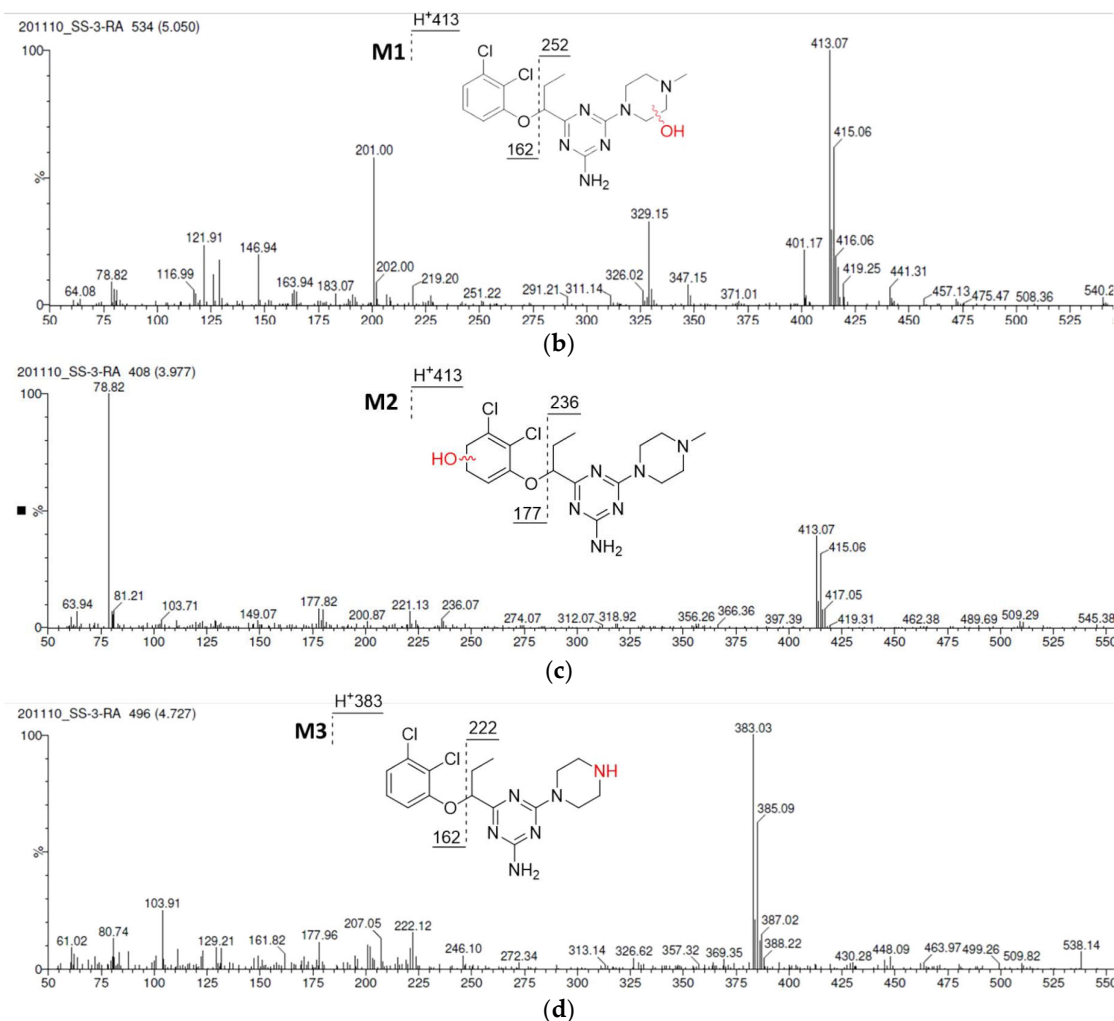

**Figure S1.** (a) MS spectra of compound 2, control. (b) MS spectra and the most probable structure of compound's 2 metabolite M1 obtained after 120 min incubation with RLMS. (c) MS spectra and the most probable structure of compound's 2 metabolite M2 obtained after 120 min incubation with RLMS. (d) MS spectra and the most probable structure of compound's 2 metabolite M3 obtained after 120 min incubation with RLMS.

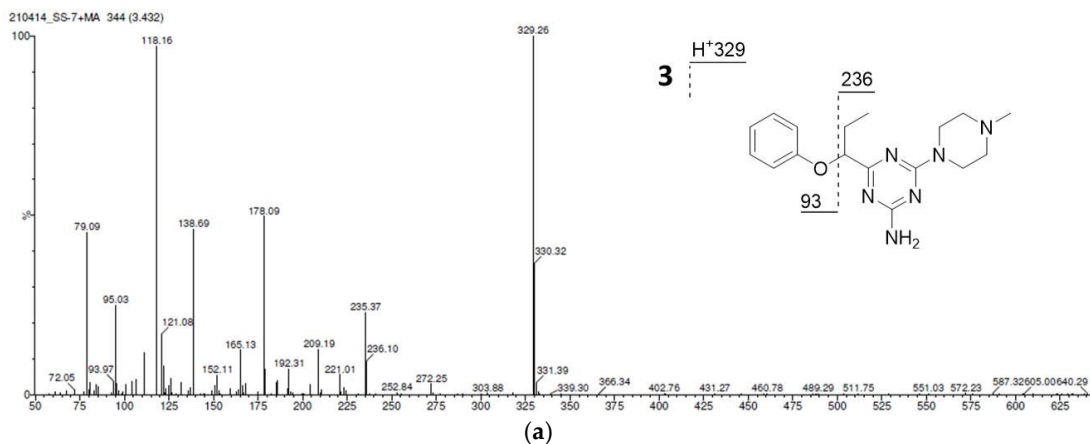

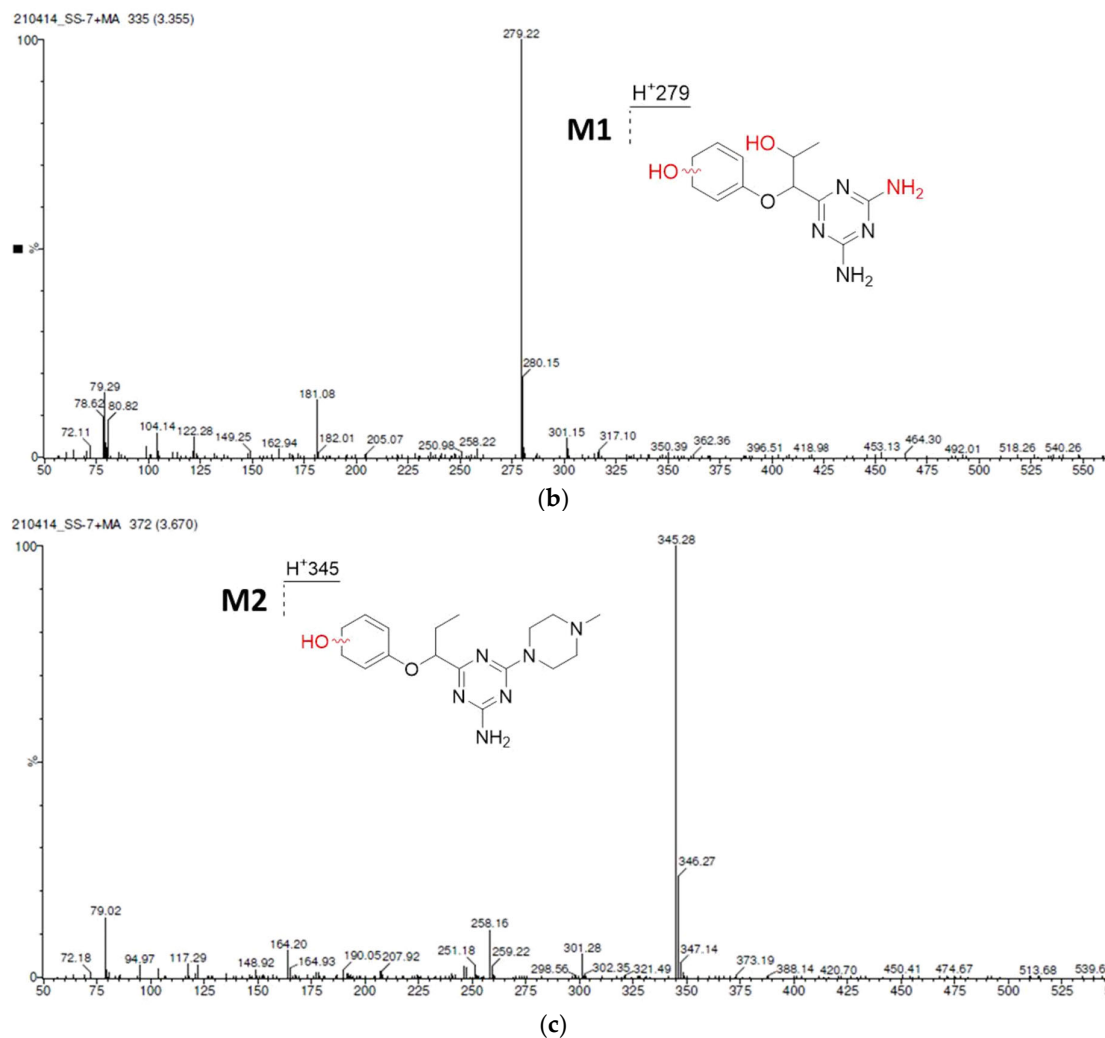

**Figure S2.** (a) MS spectra of compound 3, control. (b) MS spectra and the most probable structure of compound's 3 metabolite M1 obtained after 120 min incubation with RLMs. (c) MS spectra and the most probable structure of compound's 9 metabolite M2 obtained after 120 min incubation with RLMs.
